# Supplementary material for: Radical surgery versus organ preservation via short-course radiotherapy followed by transanal endoscopic microsurgery for early-stage rectal cancer (TREC): a randomised, open-label feasibility study
Source: PubMed Central journal article supplement (PMC7802515; doi:10.1016/s2468-1253(20)30333-2), 2020-12-11
Supplement: mmc1.pdf [file mmc1.pdf]

# THE LANCET

## Gastroenterology & Hepatology

### Supplementary appendix

This appendix formed part of the original submission and has been peer reviewed. We post it as supplied by the authors.

Supplement to: Bach SP, Gilbert A, Brock K, et al. Radical surgery versus organ preservation via short-course radiotherapy followed by transanal endoscopic microsurgery for early-stage rectal cancer (TREC): a randomised, open-label feasibility study. *Lancet Gastroenterol Hepatol* 2020; published online Dec 10. [https://doi.org/10.1016/S2468-1253\(20\)30333-2](https://doi.org/10.1016/S2468-1253(20)30333-2).

## TREC supplementary tables and figures

| Toxicity type              | Toxicity grade | Randomised             |                       | Non-randomised         |                      |
|----------------------------|----------------|------------------------|-----------------------|------------------------|----------------------|
|                            |                | Organ saving<br>(n=27) | TME surgery<br>(n=28) | Organ saving<br>(n=61) | TME surgery<br>(n=7) |
| <b>All toxicity</b>        |                |                        |                       |                        |                      |
|                            | Grade 1-3      | 20/27 (80%)            | 2/3 (67%)             | 39/60 (75%)            | -                    |
|                            | Grade 3        | 4/27 (15%)             | 0/3 (0%)              | 4/60 (7%)              | -                    |
| <b>Specific toxicities</b> |                |                        |                       |                        |                      |
| Anorectal pain             | Grade 1-2      | 1                      | 0                     | 2                      | -                    |
| Constipation               | Grade 1-2      | 1                      | 0                     | 4                      | -                    |
| Cystitis                   | Grade 1-2      | 6                      | 0                     | 11                     | -                    |
| Diarrhoea                  | Grade 1-2      | 11                     | 2                     | 21                     | -                    |
|                            | Grade 3        | 4                      | 0                     | 3                      | -                    |
| Nausea                     | Grade 1-2      | 5                      | 0                     | 7                      | -                    |
| Proctitis                  | Grade 1-2      | 1                      | 0                     | 3                      | -                    |
|                            | Grade 3        | 2                      | 0                     | 2                      | -                    |
| Rectal bleeding            | Grade 1        | 1                      | 0                     | 5                      | -                    |
| Skin reaction              | Grade 1-2      | 7                      | 0                     | 10                     | -                    |
|                            | Grade 3        | 0                      | 0                     | 1                      | -                    |
| Vomiting                   | Grade 1        | 2                      | 0                     | 3                      | -                    |

**Supplementary table 1:** Radiotherapy toxicity by intention-to-treat using CTCAE v4.0 (reported at 3-weeks following completion of SCRT)

| Treatment | 1 <sup>st</sup> surgery | TNM stage 1 <sup>st</sup> surgery | R  | High grade | Ly | V  | 2nd surgery                                         | TNM stage 2 <sup>nd</sup> surgery | Local recurrence                    | Distant recurrence      | Follow up time (yr) | DFS time (yr) | OS time (yr) |
|-----------|-------------------------|-----------------------------------|----|------------|----|----|-----------------------------------------------------|-----------------------------------|-------------------------------------|-------------------------|---------------------|---------------|--------------|
| OP        | TEM                     | ypT3Nx                            | R0 | No         | No | No | Declined early conversion LAR                       | n/a                               | Rectal wall (No salvage)            | Para-aortic nodes       | 5.03                | 2.83          | 5.03         |
| OP        | TEM                     | ypT2Nx                            | R1 | No         | No | No | Salvaged by low Hartman [declined early conversion] | ypT0N2 (4/23)                     | Rectosigmoid lymph nodes (resected) | No                      | 5.36                | 4.49          | -            |
| OP        | TEM                     | ypT3Nx                            | R0 | No         | No | +  | Converted APE                                       | No residual tumour                | No                                  | Liver, lung             | 4.64                | 4.28          | -            |
| OP        | TEM                     | ypT2Nx                            | R0 | Yes        | No | +  | Converted LAR                                       | ypT2LyV+N0R0                      | No                                  | Liver & lung            | 4.96                | 2.46          | -            |
| OP        | TEM                     | ypT3Nx                            | R0 | No         | No | No | Declined early conversion APE                       | n/a                               | Rectal wall (unfit for salvage)     | No                      | 2.57                | 1.75          | -            |
| OP        | TEM                     | ypT2Nx                            | R0 | Yes        | No | +  | Converted LAR                                       | ypT2LyV+N0R1 (distal margin)      | No                                  | Liver, lung & adrenal   | 2.24                | 1.19          | 2.24         |
| TME       | LAR                     | pT2N0                             | R0 | Yes        | No | No | n/a                                                 | n/a                               | No                                  | Lung                    | 4.96                | 2.64          | -            |
| TME*      | TEM                     | ypT2Nx                            | R0 | No         | No | No | Converted APE                                       | No residual tumour                | No                                  | Liver & lung (resected) | 4.08                | 0.35          | -            |

**Supplementary table 2:** Characteristics of cancer recurrences in the randomised patient population. \* randomised to TME but primary treatment was OP (protocol deviation). [Key: TNM – tumour, node, metastasis; R – resection margin; Ly – lymphatic invasion; V – vascular invasion; sm – submucosal tumour stage; APE – abdominoperineal excision]

| Treatment | 1st surgery | TNM stage 1 <sup>st</sup> surgery | R  | High grade | Ly | V  | 2nd surgery            | Local recurrence                              | Distant recurrence | Follow up time (yr) | DFS time (yr) | OS time (yr) |
|-----------|-------------|-----------------------------------|----|------------|----|----|------------------------|-----------------------------------------------|--------------------|---------------------|---------------|--------------|
| OP        | TEM         | ypT2Nx                            | R0 | No         | No | +  | No                     | No                                            | Lung               | 5.85                | 1.36          | -            |
| OP        | TEM         | ypT1sm1Nx                         | R0 | No         | No | No | No                     | Mesorectal nodes                              | Liver              | 1.39                | 1.30          | 1.39         |
| OP        | TEM         | ypT1sm1Nx                         | R0 | No         | No | No | Salvaged by APE        | Rectal wall at TEM site                       | No                 | 5.70                | 4.83          | -            |
| OP        | TEM         | ypT1sm3Nx                         | R0 | No         | No | No | No                     | Rectal wall at TEM site                       | Liver & lung       | 3.38                | 1.25          | -            |
| OP        | TEM         | ypT3Nx                            | R0 | No         | No | No | No                     | No                                            | Liver              | 3.55                | 0.74          | -            |
| OP        | TEM         | ypT2Nx                            | R0 | Yes        | No | No | Unfit surgical salvage | Mesorectal and extra-mesorectal lymph nodes   | No                 | 1.66                | 1.66          | -            |
| OP        | TEM         | ypT0Nx                            | R0 | No         | No | No | Unfit surgical salvage | Rectal wall at TEM site                       | CT scan not done   | 2.52                | 1.41          | -            |
| OP        | TEM         | ypT0Nx                            | R0 | No         | No | No | No                     | No                                            | Liver & lung       | 1.17                | 0.99          | 1.17         |
| OP        | TEM         | ypT1sm2                           | R0 | Yes        | No | No | Salvage APE            | Rectal wall and mesorectal nodes:<br>ypT3N1R0 | No                 | 2.32                | 2.11          | -            |

**Supplementary table 3:** Characteristics of cancer recurrences in the non-randomised patient population

[Key: TNM – tumour, node, metastasis; R – resection margin; Ly – lymphatic invasion; V – vascular invasion; sm – submucosal tumour stage; APE – abdominoperineal excision]

|                                                                        | Baseline       |                | 3 months       |                | 6 months       |                | 12 months      |                | 24 months      |                | 36 months      |                |
|------------------------------------------------------------------------|----------------|----------------|----------------|----------------|----------------|----------------|----------------|----------------|----------------|----------------|----------------|----------------|
|                                                                        | OP             | TME            | OP             | TME            | OP             | TME            | OP             | TME            | OP             | TME            | OP             | TME            |
| <b>EORTC QLQ C30 FUNCTION: higher scores = better function (0-100)</b> |                |                |                |                |                |                |                |                |                |                |                |                |
| Global health status <sup>§</sup>                                      | 83.7 (2.7; 26) | 79.5 (4.8; 24) | 75.5 (3.5; 18) | 63.2 (4.8; 24) | 80.4 (3.4; 20) | 73.2 (4.1; 23) | 78.3 (3.5; 20) | 69.9 (4.4; 23) | 76.2 (5.3; 20) | 69.4 (4.6; 21) | 84.5 (1.7; 14) | 67.6 (5.9; 18) |
| Physical functioning <sup>§</sup>                                      | 88.6 (3.3; 26) | 85.6 (4.5; 24) | 86.0 (3.4; 19) | 73.1 (5.7; 24) | 85.7 (4.2; 20) | 81.2 (4.2; 23) | 83.9 (4.4; 20) | 78.2 (5.4; 22) | 80.0 (5.1; 20) | 79.2 (4.4; 21) | 88.7 (1.9; 13) | 79.0 (5.0; 17) |
| Role functioning <sup>§</sup>                                          | 93.6 (2.9; 26) | 83.3 (6.6; 24) | 77.2 (6.4; 19) | 60.4 (6.9; 24) | 84.2 (6.2; 20) | 71.7 (6.1; 23) | 87.5 (4.2; 20) | 77.3 (6.0; 22) | 78.3 (6.4; 20) | 76.2 (5.8; 21) | 89.7 (4.0; 13) | 69.4 (7.2; 18) |
| Emotional functioning <sup>§</sup>                                     | 85.6 (2.5; 26) | 74.0 (5.8; 24) | 90.3 (3.4; 18) | 74.7 (5.0; 24) | 90.0 (2.6; 20) | 81.9 (4.8; 23) | 88.8 (2.7; 20) | 79.5 (5.0; 22) | 85.0 (4.2; 20) | 81.1 (4.5; 21) | 90.5 (2.9; 14) | 76.9 (6.1; 18) |
| Cognitive functioning <sup>§</sup>                                     | 89.7 (3.3; 26) | 81.2 (5.1; 24) | 89.8 (4.7; 18) | 79.2 (6.1; 24) | 91.7 (3.3; 20) | 85.5 (4.2; 23) | 90.4 (2.6; 19) | 84.8 (3.6; 23) | 87.5 (4.5; 20) | 86.7 (4.8; 20) | 95.2 (3.7; 14) | 76.9 (5.7; 18) |
| Social functioning <sup>§</sup>                                        | 94.9 (2.4; 26) | 86.1 (6.1; 24) | 82.4 (5.9; 18) | 60.4 (6.9; 24) | 90.8 (3.9; 20) | 68.1 (6.2; 23) | 91.7 (2.6; 20) | 71.2 (7.0; 22) | 83.3 (5.9; 20) | 64.2 (7.8; 20) | 90.5 (4.2; 14) | 62.0 (6.0; 18) |
| <b>EORTC QLQ C30 SYMPTOMS: higher scores = worse symptoms (0-100)</b>  |                |                |                |                |                |                |                |                |                |                |                |                |
| Fatigue                                                                | 16.2 (4.1; 26) | 25.0 (5.8; 24) | 17.8 (4.7; 19) | 36.6 (5.4; 24) | 18.9 (5.1; 20) | 27.5 (5.0; 23) | 15.6 (3.7; 20) | 31.3 (5.6; 22) | 21.1 (5.7; 20) | 30.2 (5.2; 21) | 12.0 (3.9; 13) | 27.8 (5.6; 18) |
| Nausea and vomiting                                                    | 3.2 (2.6; 26)  | 5.6 (2.2; 24)  | 1.8 (1.8; 19)  | 10.4 (4.5; 24) | 2.5 (1.8; 20)  | 5.1 (3.7; 23)  | 5.8 (3.5; 20)  | 7.6 (4.2; 22)  | 5.0 (3.0; 20)  | 3.3 (1.9; 20)  | 1.3 (1.3; 13)  | 13.0 (6.1; 18) |
| Pain                                                                   | 13.5 (3.9; 26) | 16.7 (5.4; 24) | 9.6 (4.1; 19)  | 26.4 (6.6; 24) | 16.7 (5.8; 20) | 18.1 (5.8; 23) | 10.5 (4.5; 19) | 19.6 (5.0; 23) | 15.0 (3.6; 20) | 15.9 (3.7; 21) | 9.5 (3.4; 14)  | 25.0 (5.9; 18) |
| Dyspnoea                                                               | 9.0 (3.9; 26)  | 9.7 (5.1; 24)  | 7.0 (4.1; 19)  | 16.7 (5.7; 24) | 18.3 (7.0; 20) | 11.6 (4.0; 23) | 18.3 (5.1; 20) | 16.7 (6.1; 22) | 13.3 (6.1; 20) | 19.0 (7.1; 21) | 7.7 (4.1; 13)  | 16.7 (5.6; 18) |
| Insomnia                                                               | 19.2 (4.2; 26) | 29.2 (6.7; 24) | 24.6 (8.0; 19) | 33.3 (6.0; 24) | 23.3 (4.9; 20) | 27.5 (5.4; 23) | 23.3 (5.5; 20) | 30.3 (6.2; 22) | 20.0 (6.6; 20) | 29.8 (7.2; 19) | 10.3 (5.8; 13) | 37.0 (7.1; 18) |
| Appetite loss                                                          | 7.7 (4.6; 26)  | 15.3 (6.6; 24) | 5.3 (2.9; 19)  | 20.8 (6.0; 24) | 6.7 (3.9; 20)  | 10.1 (4.9; 23) | 5.0 (5.0; 20)  | 13.6 (5.2; 22) | 11.7 (4.4; 20) | 12.7 (4.3; 21) | 2.6 (2.6; 13)  | 16.7 (6.7; 18) |
| Constipation                                                           | 0.0 (0.0; 26)  | 16.7 (5.3; 24) | 5.3 (5.3; 19)  | 10.1 (4.4; 23) | 3.3 (2.3; 20)  | 14.5 (5.9; 23) | 3.3 (2.3; 20)  | 16.7 (5.3; 22) | 10.0 (4.3; 20) | 17.5 (4.9; 21) | 7.7 (5.5; 13)  | 14.8 (4.0; 18) |
| Diarrhoea                                                              | 11.5 (3.7; 26) | 18.1 (5.7; 24) | 9.3 (3.6; 18)  | 16.7 (5.3; 22) | 11.7 (4.4; 20) | 23.2 (6.8; 23) | 8.8 (5.0; 19)  | 22.2 (7.4; 21) | 8.3 (3.3; 20)  | 17.5 (5.5; 21) | 4.8 (3.2; 14)  | 31.5 (8.3; 18) |
| Financial problems                                                     | 1.3 (1.3; 26)  | 13.9 (6.3; 24) | 1.9 (1.9; 18)  | 22.2 (7.7; 24) | 6.7 (5.2; 20)  | 8.7 (4.3; 23)  | 1.7 (1.7; 20)  | 15.9 (5.5; 23) | 11.7 (6.1; 20) | 12.3 (5.2; 19) | 0.0 (0.0; 14)  | 22.2 (8.1; 18) |

**Supplementary table 4: EORTC-QLQ C30 PRO data [mean (SD; N)] over time for randomised patients; organ preservation [OP] using SCRT and TEM versus total mesorectal excision [TME]. <sup>§</sup> Function scores: higher scores = better function.**

|                                                                        | Baseline       |                 | 3 months        |                 | 6 months       |                 | 12 months       |                 | 24 months      |                | 36 months       |                 |
|------------------------------------------------------------------------|----------------|-----------------|-----------------|-----------------|----------------|-----------------|-----------------|-----------------|----------------|----------------|-----------------|-----------------|
|                                                                        | OP             | TME             | OP              | TME             | OP             | TME             | OP              | TME             | OP             | TME            | OP              | TME             |
| <b>EORTC-QLQ C29 FUNCTION: higher scores = better function (0-100)</b> |                |                 |                 |                 |                |                 |                 |                 |                |                |                 |                 |
| Body Image <sup>§</sup>                                                | 94.7 (2.0; 25) | 76.2 (6.3; 24)  | 93.6 (2.3; 19)  | 61.3 (5.6; 24)  | 94.7 (2.0; 20) | 67.9 (4.3; 23)  | 94.2 (2.0; 19)  | 69.8 (5.5; 23)  | 93.3 (2.2; 20) | 66.1 (7.2; 21) | 92.1 (2.7; 14)  | 66.4 (7.0; 18)  |
| Health anxiety <sup>§</sup>                                            | 74.7 (4.8; 25) | 53.3 (5.8; 25)  | 82.5 (6.4; 19)  | 51.4 (6.3; 24)  | 80.0 (4.5; 20) | 66.7 (5.1; 23)  | 71.7 (5.6; 20)  | 63.8 (6.3; 23)  | 71.7 (5.6; 20) | 57.1 (7.3; 21) | 78.6 (4.4; 14)  | 68.5 (5.0; 18)  |
| Weight worries <sup>§</sup>                                            | 84.6 (4.2; 26) | 70.7 (7.0; 25)  | 91.2 (3.5; 19)  | 70.8 (6.4; 24)  | 95.0 (2.7; 20) | 75.4 (7.0; 23)  | 95.0 (3.6; 20)  | 75.4 (5.6; 23)  | 86.7 (3.7; 20) | 85.7 (4.9; 21) | 85.7 (5.8; 14)  | 79.6 (6.1; 18)  |
| Male libido (sexual interest) <sup>§</sup>                             | 43.1 (6.9; 17) | 30.6 (9.6; 12)  | 25.6 (6.7; 13)  | 13.9 (6.4; 12)  | 35.7 (5.5; 14) | 27.8 (9.9; 12)  | 31.0 (5.5; 14)  | 25.0 (7.3; 12)  | 30.8 (8.8; 13) | 33.3 (9.9; 10) | 21.2 (6.8; 11)  | 36.4 (7.0; 11)  |
| Female libido (sexual interest) <sup>§</sup>                           | 13.3 (13.3; 5) | 12.5 (6.1; 8)   | 0.0 (0.0; 5)    | 6.7 (4.4; 10)   | 0.0 (0.0; 4)   | 16.7 (6.3; 8)   | 0.0 (0.0; 2)    | 9.5 (6.1; 7)    | 11.1 (11.1; 3) | 23.8 (6.1; 7)  | 0.0 (0.0; 2)    | 5.6 (5.6; 6)    |
| <b>EORTC-QLQ C29 SYMPTOMS: higher scores = worse symptoms (0-100)</b>  |                |                 |                 |                 |                |                 |                 |                 |                |                |                 |                 |
| Urinary frequency                                                      | 25.0 (4.7; 26) | 34.0 (5.3; 25)  | 25.0 (6.1; 18)  | 34.8 (6.3; 23)  | 25.8 (5.7; 20) | 37.1 (5.0; 22)  | 25.8 (5.1; 20)  | 31.2 (5.6; 23)  | 30.7 (5.7; 19) | 34.2 (4.9; 20) | 21.4 (6.2; 14)  | 34.3 (5.1; 18)  |
| Blood/Mucous in stools                                                 | 16.7 (4.0; 26) | 29.3 (5.9; 25)  | 8.8 (3.2; 19)   | 7.2 (3.3; 23)   | 6.7 (2.8; 20)  | 3.2 (1.9; 21)   | 5.0 (1.8; 20)   | 9.1 (3.9; 22)   | 5.8 (3.7; 20)  | 3.2 (2.2; 21)  | 2.4 (1.6; 14)   | 7.4 (2.8; 18)   |
| Stool frequency                                                        | 9.4 (2.5; 23)  | 13.5 (3.9; 21)  | 26.5 (5.2; 17)  | 18.8 (4.1; 23)  | 18.4 (4.4; 19) | 39.4 (6.7; 22)  | 18.5 (4.0; 18)  | 31.1 (4.9; 22)  | 14.6 (3.7; 16) | 26.3 (5.5; 19) | 14.3 (4.2; 14)  | 30.6 (5.6; 18)  |
| Urinary incontinence                                                   | 3.8 (2.8; 26)  | 10.7 (5.0; 25)  | 5.6 (3.0; 18)   | 17.4 (5.9; 23)  | 5.0 (2.7; 20)  | 16.7 (5.7; 22)  | 3.5 (2.4; 19)   | 23.2 (6.1; 23)  | 14.0 (5.3; 19) | 15.0 (4.5; 20) | 2.4 (2.4; 14)   | 14.8 (4.0; 18)  |
| Dysuria                                                                | 1.3 (1.3; 26)  | 4.2 (4.2; 24)   | 0.0 (0.0; 18)   | 13.0 (5.4; 23)  | 3.3 (2.3; 20)  | 6.3 (2.9; 21)   | 3.3 (2.3; 20)   | 8.7 (3.8; 23)   | 8.3 (4.1; 20)  | 1.7 (1.7; 20)  | 2.4 (2.4; 14)   | 1.9 (1.9; 18)   |
| Abdominal pain                                                         | 5.1 (3.6; 26)  | 13.9 (4.4; 24)  | 3.5 (2.4; 19)   | 18.8 (5.1; 23)  | 3.3 (2.3; 20)  | 9.1 (3.9; 22)   | 5.0 (2.7; 20)   | 14.5 (4.1; 23)  | 6.7 (3.1; 20)  | 15.9 (4.4; 21) | 4.8 (3.2; 14)   | 16.7 (5.6; 18)  |
| Buttock pain                                                           | 3.8 (2.1; 26)  | 13.9 (5.3; 24)  | 14.0 (5.9; 19)  | 26.1 (6.3; 23)  | 10.0 (4.3; 20) | 16.7 (5.3; 22)  | 5.0 (2.7; 20)   | 20.3 (5.8; 23)  | 13.3 (4.5; 20) | 20.6 (5.4; 21) | 7.1 (3.8; 14)   | 18.5 (6.2; 18)  |
| Bloating                                                               | 11.5 (3.7; 26) | 18.7 (5.8; 25)  | 8.8 (3.5; 19)   | 26.4 (6.0; 24)  | 13.3 (3.7; 20) | 16.7 (4.2; 22)  | 11.7 (4.4; 20)  | 26.1 (6.6; 23)  | 6.7 (3.9; 20)  | 11.7 (4.4; 20) | 7.7 (4.1; 13)   | 22.2 (5.4; 18)  |
| Dry mouth                                                              | 11.5 (4.5; 26) | 21.3 (6.0; 25)  | 8.8 (4.3; 19)   | 22.2 (5.6; 24)  | 13.3 (5.1; 20) | 24.6 (7.3; 23)  | 13.3 (4.5; 20)  | 23.2 (6.4; 23)  | 20.0 (6.6; 20) | 17.5 (5.5; 21) | 14.3 (4.6; 14)  | 20.4 (7.2; 18)  |
| Hair loss                                                              | 1.3 (1.3; 25)  | 1.3 (1.3; 25)   | 7.0 (3.2; 19)   | 9.7 (4.2; 24)   | 3.3 (2.3; 20)  | 12.1 (5.2; 22)  | 0.0 (0.0; 20)   | 3.0 (2.1; 22)   | 1.7 (1.7; 20)  | 3.3 (2.3; 20)  | 4.8 (4.8; 14)   | 7.4 (5.8; 18)   |
| Taste change                                                           | 2.6 (1.8; 26)  | 8.0 (4.8; 25)   | 0.0 (0.0; 19)   | 15.3 (5.3; 24)  | 1.7 (1.7; 20)  | 7.6 (3.0; 22)   | 3.3 (2.3; 20)   | 13.0 (5.0; 23)  | 6.7 (3.9; 20)  | 9.5 (4.7; 21)  | 2.4 (2.4; 14)   | 3.9 (2.7; 17)   |
| Flatulence                                                             | 23.2 (4.9; 23) | 35.0 (6.6; 20)  | 29.2 (7.4; 16)  | 33.3 (4.9; 22)  | 21.1 (6.4; 19) | 42.0 (4.8; 23)  | 29.6 (6.0; 18)  | 42.4 (6.6; 22)  | 31.2 (6.4; 16) | 40.0 (5.7; 20) | 33.3 (7.8; 14)  | 40.7 (6.9; 18)  |
| Faecal incontinence                                                    | 2.9 (2.0; 23)  | 5.0 (2.7; 20)   | 17.6 (7.6; 17)  | 24.6 (5.2; 23)  | 15.8 (6.4; 19) | 30.3 (5.8; 22)  | 17.6 (7.1; 17)  | 15.9 (4.4; 21)  | 12.5 (4.2; 16) | 19.3 (6.4; 19) | 19.0 (5.8; 14)  | 25.9 (8.8; 18)  |
| Sore skin                                                              | 4.3 (3.2; 23)  | 7.9 (3.2; 21)   | 19.6 (7.6; 17)  | 27.5 (5.4; 23)  | 19.3 (6.9; 19) | 34.8 (6.4; 22)  | 7.4 (3.4; 18)   | 22.2 (5.3; 21)  | 8.3 (4.8; 16)  | 19.3 (6.4; 19) | 7.1 (7.1; 14)   | 24.1 (5.3; 18)  |
| Embarrassment about bowel function                                     | 5.8 (2.7; 23)  | 11.7 (5.6; 20)  | 17.6 (8.1; 17)  | 34.8 (6.8; 23)  | 12.3 (5.8; 19) | 36.2 (7.2; 23)  | 16.7 (6.2; 18)  | 31.7 (7.1; 21)  | 10.4 (5.9; 16) | 33.3 (7.3; 20) | 7.1 (3.8; 14)   | 38.9 (7.3; 18)  |
| Impotence                                                              | 31.4 (7.8; 17) | 21.2 (10.3; 11) | 36.4 (11.4; 11) | 25.0 (11.7; 12) | 42.9 (8.1; 14) | 55.6 (13.8; 12) | 51.3 (10.4; 13) | 48.5 (12.2; 11) | 48.1 (14.8; 9) | 51.9 (16.8; 9) | 48.5 (13.8; 11) | 53.3 (14.2; 10) |
| Dyspareunia                                                            | 0.0 (0.0; 4)   | 0.0 (0.0; 5)    | 8.3 (8.3; 4)    | 11.1 (11.1; 3)  | 0.0 (0.0; 2)   | 16.7 (16.7; 2)  | 0.0 (0.0; 2)    | 11.1 (11.1; 3)  | 22.2 (22.2; 3) | 11.1 (11.1; 3) | 0.0 (0.0; 2)    | 13.3 (8.2; 5)   |

**Supplementary table 5: EORTC-QLQ C29 PRO data [mean (SD; N)] over time for randomised patients; organ preservation [OP] using SCRT and TEM versus total mesorectal excision [TME].<sup>§</sup> Function scores: higher scores = better function.**

| EORTC QLQ C30                      | Baseline                                                      | 3 months | 6 months | 12 months | 24 months | 36 months |
|------------------------------------|---------------------------------------------------------------|----------|----------|-----------|-----------|-----------|
| <b>FUNCTION ITEMS</b>              | <b>Percentage probability of benefit of OP vs TME surgery</b> |          |          |           |           |           |
| Global health status <sup>§</sup>  | 73.5                                                          | 98.6     | 93.8     | 95.8      | 94.6      | 94        |
| Physical functioning <sup>§</sup>  | 81.7                                                          | 93       | 75.1     | 89.5      | 85.7      | 81.7      |
| Role functioning <sup>§</sup>      | 82.7                                                          | 98.8     | 95.7     | 95        | 69        | 95        |
| Emotional functioning <sup>§</sup> | 98.4                                                          | 99.7     | 97.3     | 99.3      | 95.9      | 97.3      |
| Cognitive functioning <sup>§</sup> | 95.8                                                          | 95.3     | 85.8     | 92.3      | 82.3      | 98.2      |
| Social functioning <sup>§</sup>    | 92                                                            | 99.7     | 99.8     | 100       | 99.4      | 99.7      |
| <b>SYMPTOMS ITEMS</b>              |                                                               |          |          |           |           |           |
| Fatigue                            | 93.7                                                          | 99.5     | 88.3     | 99.5      | 87.1      | 89        |
| Nausea and vomiting                | 74                                                            | 96.6     | 75       | 74.3      | 41.4      | 97.7      |
| Pain                               | 73.3                                                          | 97.6     | 51.5     | 88.6      | 52.1      | 80.9      |
| Dyspnoea                           | 63.1                                                          | 88.6     | 21.5     | 54.2      | 77        | 72.8      |
| Insomnia                           | 94.9                                                          | 82.8     | 75.6     | 87.4      | 92        | 97        |
| Appetite loss                      | 90.2                                                          | 98.8     | 80.3     | 97.5      | 58.2      | 93.3      |
| Constipation                       | 99.8                                                          | 78.6     | 96.7     | 99.6      | 88.7      | 81.8      |
| Diarrhoea                          | 89.6                                                          | 85.1     | 93.6     | 97.8      | 92.3      | 99.4      |
| Financial problems                 | 98.6                                                          | 99.8     | 66.9     | 99.1      | 75.8      | 99        |

**Supplementary table 6:** Bayesian model analysis of EORTC QLQ C30 for randomised patients. <sup>§</sup> Function scores. FUNCTION: Probability that the mean score under SCPRT + TEMS is greater than that under radical surgery (adjusted for assessment timepoint and patient baseline value). SYMPTOMS: Probability that the mean score under SCPRT + TEMS is less than that under radical surgery (adjusted for assessment timepoint and patient baseline value). Note analysis not possible for female libido or dyspareunia items.

| EORTC QLQ C29                              | Baseline                                                      | 3 months | 6 months | 12 months | 24 months | 36 months |
|--------------------------------------------|---------------------------------------------------------------|----------|----------|-----------|-----------|-----------|
| <b>FUNCTION ITEMS</b>                      | <b>Percentage probability of benefit of OP vs TME surgery</b> |          |          |           |           |           |
| Body Image <sup>§</sup>                    | 99.7                                                          | 100      | 100      | 100       | 100       | 99.6      |
| Health anxiety <sup>§</sup>                | 99.9                                                          | 100      | 98       | 94.2      | 97.7      | 92.9      |
| Weight worries <sup>§</sup>                | 94.8                                                          | 96.9     | 99.7     | 100       | 58.3      | 69.5      |
| Male libido (sexual interest) <sup>§</sup> | 92.5                                                          | 98       | 71.2     | 82        | 56.4      | 22.3      |
| <b>SYMPTOM ITEMS</b>                       |                                                               |          |          |           |           |           |
| Urinary frequency                          | 93.5                                                          | 76.9     | 72       | 56.2      | 48.3      | 68.1      |
| Blood/Mucous in stools                     | 96.1                                                          | 11.7     | 4.5      | 49.5      | 15.7      | 78.8      |
| Stool frequency                            | 89.7                                                          | 27.7     | 99.9     | 98.9      | 98.2      | 96.6      |
| Urinary incontinence                       | 96.5                                                          | 94.5     | 94.5     | 100       | 64.8      | 96.4      |
| Dysuria                                    | 67.9                                                          | 100      | 79.2     | 89.4      | 8.4       | 40.8      |
| Abdominal pain                             | 99.4                                                          | 99.9     | 92.2     | 96.5      | 96.7      | 93.3      |
| Buttock pain                               | 97.2                                                          | 93.5     | 80.2     | 98.5      | 83.8      | 68.3      |
| Bloating                                   | 88.5                                                          | 98.9     | 76.7     | 98.1      | 79.3      | 93.5      |
| Dry mouth                                  | 92.2                                                          | 97.9     | 90.2     | 96.5      | 42.7      | 47.7      |
| Hair loss                                  | 36.1                                                          | 43.9     | 84.7     | 99.1      | 55.2      | 31.9      |
| Taste change                               | 90.2                                                          | 100      | 95.5     | 97.9      | 80.3      | 67        |
| Flatulence                                 | 97.4                                                          | 73.7     | 99.1     | 92.3      | 89        | 51.6      |
| Faecal incontinence                        | 93.3                                                          | 81.8     | 96.2     | 67        | 83.6      | 51.5      |
| Sore skin                                  | 95.3                                                          | 91       | 97.4     | 99.7      | 96.6      | 99.9      |
| Embarrassment about bowel function         | 98.8                                                          | 98       | 99.4     | 98.9      | 99.8      | 99.9      |
| Impotence                                  | 5                                                             | 13.4     | 47.1     | 24        | 48.3      | 55.7      |

**Supplementary table 7:** Bayesian model analysis of EORTC QLQ CR29 for randomised patients. <sup>§</sup> Function scores. FUNCTION: Probability that the mean score under SCPRT + TEMS is greater than that under radical surgery (adjusted for assessment timepoint and patient baseline value). SYMPTOMS: Probability that the mean score under SCPRT + TEMS is less than that under radical surgery (adjusted for assessment timepoint and patient baseline value). Note analysis not possible for female libido or dyspareunia items.



**Supplementary figure 1:** cumulative recruitment of randomised and non-randomised (registered) patients according to site.

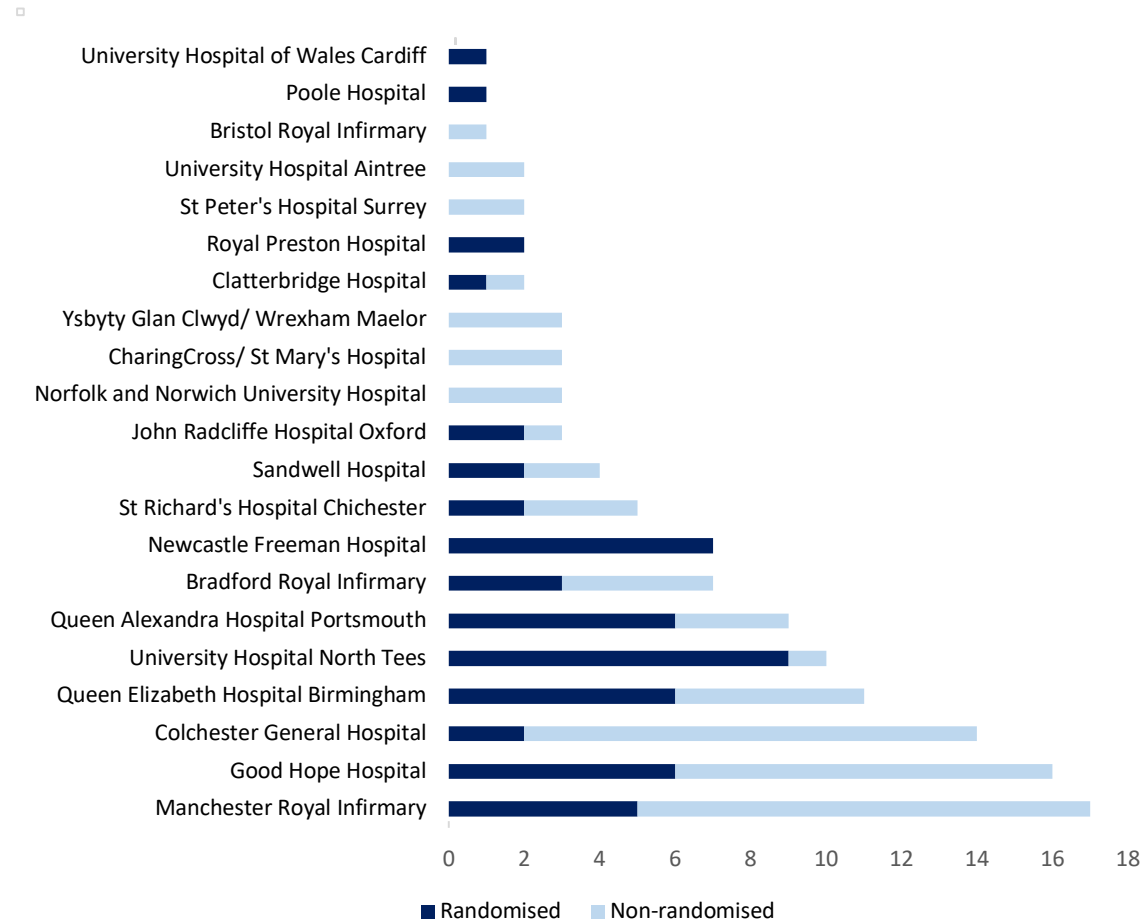

**Supplementary figure 2:** CONSORT diagram of study patients and complete PRO forms. MDT: Multidisciplinary team; SCPRT: Short course pre-operative radiotherapy; TEMS: Transanal endoscopic microsurgery; TME: Total mesorectal excision

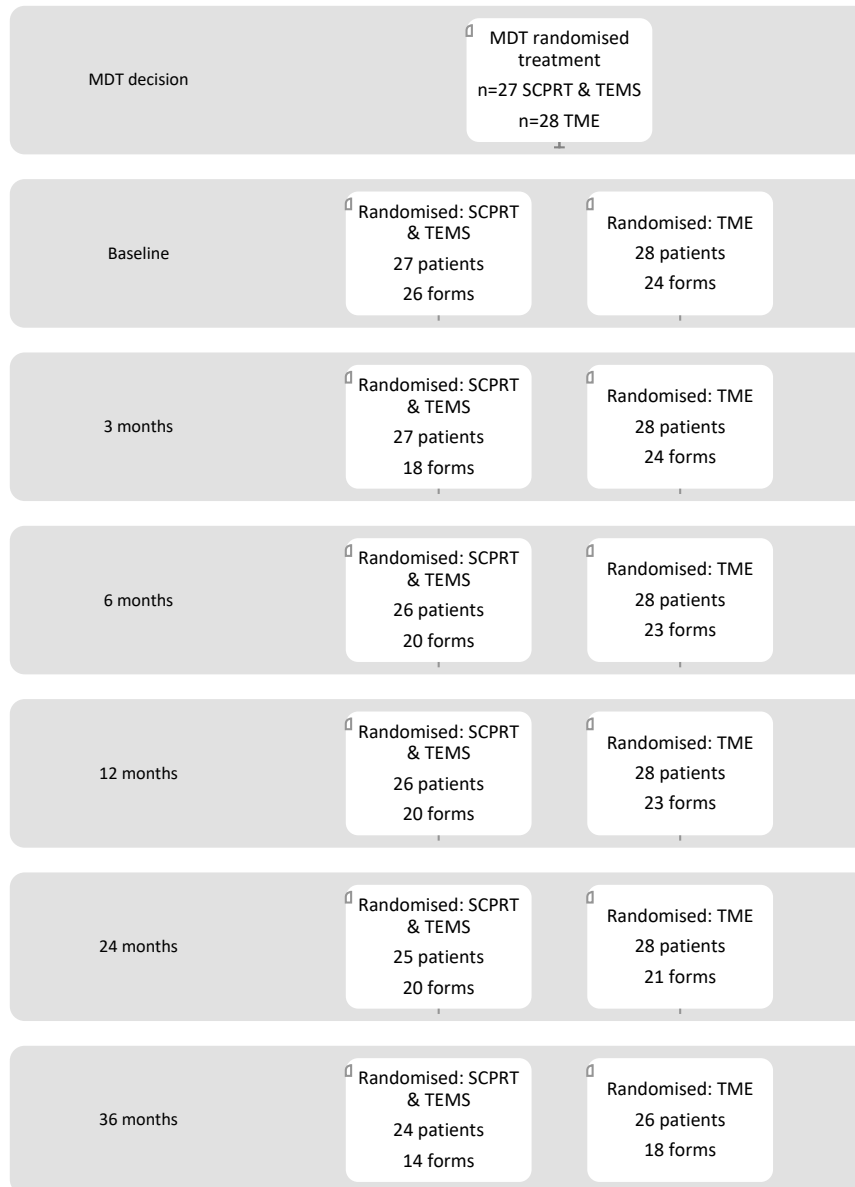

## **TREC Collaborative Group**

**Chief Investigator:** Simon Bach (University Hospital Birmingham NHS Foundation Trust)

### **Trial management committee:**

Simon Bach, Gina Brown, Christopher Cunningham, Ian Geh, Richard Gray, Kelly Handley, Jim Hill, Stephan Korsgen, Pauline Leonard, Laura Magill, John R T Monson, Neil J Mortensen, Dion G Morton, Arthur Sun-Myint, Phil Quirke, David Sebag-Montefiore, Nick West, Elizabeth Southgate.

**Independent patient advocate:** Ann Russell

**University of Birmingham Clinical Trials Unit:** Peter Antonio, Manjinder Kaur, Laura Magill, Alex Vince, (trial management); Nick Hilken, Chakanaka Sidile, Adrian Wilcockson (programming); Kelly Handley, Natalie Marchevsky (statistics).

**Data Monitoring and Ethics Committee:** Richard Peto (Chair), Tom Crosby, Brendan Moran, Julie Olliff.

**Participating centres and investigators (\*principal investigator at each centre):** Aintree University Hospitals NHS Foundation Trust; Katti Ashok, Simone Slawik\*, Andrew Smethurst, Rajaram Sripadam, Veena Tagore, Monica Terlizzo, Ashford and St Peter's Hospitals NHS Foundation Trust; Bearn Philip E, Robert Davies, Susan Dodd, Sharadah Essapen, Pasha Nisar\*, Alexandra Stewart, Jonathan Trickett, Besti Cadwaladr University Health Board; Bansal Ashish, Peter J Billings, Palanichamy Chandran, Conor Corr, Edward Favill, Simon Gollins\*, Peter Marsh, Andrew Maw\*, Rekha Neupane, Ramesh Rajagopal, Bradford Teaching Hospitals NHS Foundation Trust; Cooper Rachel A, John Philip Griffith, Paul Hatfield, Andy Lowe, Julian Ostrowski, Jonathan Robinson, Rhian Simpson, Mark Steward\*, Cardiff and Vale University Health Board; Adams Richard, Robert E Bleehen, Michael Davies\*, Meleri Morgan, East Suffolk and North Essex NHS Foundation Trust; Boone Darren, Nicola Lacey, Ian Seddon, Bruce Sizer, Helen Stunell, Matthew Tutton\*, Shaobin Wu, Frimley Health NHS Foundation Trust; Hadaki Maher, Imperial College Healthcare NHS Trust; Blunt Dominic, Susan Cleator, Ara Darzi, Robert Goldin, Paul Ziprin\*, Lancashire Teaching Hospitals NHS Foundation Trust; Alan Beveridge\* Mike Dobson, Mark A Pitt, Shabbir Susnerwala, Deborah Williamson, Manchester University NHS Foundation Trust; Jim Hill\* Georgina Howarth, Stephen Lee, Paul Wright, Newcastle Upon Tyne Hospitals NHS Foundation Trust; Paul J Hainsworth\* Tim Hoare, Alan F Horgan, Fiona McDonald, Stephanie J Needham, John Scott, Timothy Simmons, Norfolk & Norwich University Hospitals NHS Foundation Trust; Biswas Debashis, James Herson\*, Gaurav Kapur, Sandeep Kapur, James Sington, Christopher Speakman, William Stebbings, Stuart Williams, North Tees and Hartlepool NHS Foundation Trust; Adusumalli Madhavi, Anil K Agarwal, David Borowski,

Dharmendra Kumar Garg, Talvinder Gill\*, Mohammed Hegab, Catherine L Hobday, Veena Rao, Jyotsna J Shrimankar, Mohamed Amin Tabaqchali, David Wilson, Oxford University Hospitals NHS Foundation Trust; Christopher Cunningham\* Oliver Jones, Neil J Mortensen, Andrew Slater, Aron Szuts, Lai Mun Wang, Bryan F Warren, Andrew Weaver, Poole Hospital NHS Foundation Trust; Ahmad Mukhtar, Julian Alexander, Maxine Flubacher\*, David Tarver, Portsmouth Hospitals University NHS Trust; Baluch Suhail, Richard Beable, David Cowlshaw, Antony Higginson, Jim Khan\*, Prokopios Vogiatzis, Sandwell and West Birmingham NHS Trust; Neil Cruickshank\* Howard Joy, David Peake, Ulises Zanetto, The Christie NHS Foundation Trust; Mark Saunders\* The Clatterbridge Cancer Centre NHS Foundation Trust; Arthur Sun Myint\*, Rajaram Sripadam, The Leeds Teaching Hospitals NHS Trust; Cooper Rachel, Paul Hatfield, Phil Quirke, David Sebag-Montefiore\*, Mark Teo, Nick West, University Hospitals Birmingham NHS Foundation Trust; Allan Arthur, Simon Bach\*, Ian Geh, John Glaholm, Mark Goldstein, Rahul Hejmadi, Stephan Korsgen\*, Gerald Langman, Dion G Morton, Cyril A Nelson, Deborah Tattersall, University Hospitals Bristol NHS Foundation Trust; Falk Stephen, Robert Longman, Huw Roach, Jamshed Shabbir, Golda Shelley-Fraser , Michael G Thomas\*, Western Sussex Hospitals NHS Foundation Trust; Cripps Neil, Yasser Haba, Guy Harris, Max Hookway, Bruce Levy, Jay N L Simson\*, Angela Skull, Tijjani Umar.
